# Supplementary material for: Geographical variation and genetic diversity of Parashorea chinensis germplasm resources
Source: Front Plant Sci. 2024 Oct 16;15:1452521. doi: 10.3389/fpls.2024.1452521 (PMC11521830; doi:10.3389/fpls.2024.1452521)
Supplement: Supplementary Table S1 — Geographic locations and climatic conditions of the 15 germplasms used in this study. [file Table1.xlsx]

## Sheet: Table S1
Table S1 Geographic locations and climatic conditions of the 15 germplasms used in this study
Germplasm	NO.	Location	Longitude/E/°	Latitude/N/°	Altitude/m	Annual mean temperature/℃	Minimum air temperature/℃	Maximum air temperature/℃	Annual mean precipitation/mm	Annual mean relative humidity/%
Hekou 01	HK01	Hekou county, Yunnan	103.928	22.4173	380	18.3	-0.4	32.7	62	83
Hekou 02	HK02	Hekou county, Yunnan	103.927	22.677	423	18.3	-0.4	32.7	62	83
Hekou 03	HK03	Hekou county, Yunnan	103.935	22.6508	441	18.3	-0.4	32.7	62	83
Maguan 01	MG01	Maguan county, Yunnan	103.996	22.7287	601	17.5	-3.8	33.3	41	83
Maguan 02	MG02	Maguan county, Yunnan	103.995	22.7287	602	17.5	-3.8	33.3	41	83
Maguan 03	MG03	Maguan county, Yunnan	103.995	22.7287	603	17.5	-3.8	33.3	41	83
Mengla 01	ML01	Mengla county, Yunnan	101.604	21.6105	452	22	1.1	40	45	82
Mengla 02	ML02	Mengla county, Yunnan	101.536	22.2664	472	22	1.1	40	45	82
Mengla 03	ML03	Mengla county, Yunnan	101.563	21.4944	405	22	1.1	40	45	82
Mengla 04	ML04	Mengla county, Yunnan	103.927	22.677	430	22	1.1	40	45	82
Napo 01	NP01	Napo county, Guangxi	105.768	23.1081	759	19.3	-2.6	36.8	163.9	79
Napo 02	NP02	Napo county, Guangxi	108.768	23.1082	761	19.3	-2.6	36.8	163.9	79
Napo 03	NP03	Napo county, Guangxi	105.768	23.1044	660	19.3	-2.6	36.8	163.9	79
Napo 04	NP04	Napo county, Guangxi	105.888	23.1519	617	19.3	-2.6	36.8	163.9	79
Tianyang 01	TY01	Tianyang county, Guangxi	106.969	24.0234	449	22.4	0.7	40.4	178.6	78

## Sheet: Table S2
Table S2 Inter simple sequence repeat (ISSR) primers and amplification results
Primer name	Primer sequence (5’-3’)	Total number of amplified bands	Number of polymorphic bands (NPB)	Percentage of polymorphic bands (PPB)/%
UBC807	(AG)8T	6	5	83.33
UBC827	(AC)8G	5	4	80
UBC830	(TG)8G	6	4	66.66
UBC838	(TA)8RC	4	3	75
UBC847	(CA)8RC	10	6	60
UBC863	(AGT)6	8	5	62.5
UBC864	(ATG)6	10	6	60
UBC865	(CCG)6	11	6	54.55
UBC880	(GGAGA)3	12	5	41.67
UBC890	VHV(GT)7	11	6	54.55
Total	—	83	50	—
Average	—	8.3	5	63.83

## Sheet: Table S3
Table S3 Phenotypic characteristics among 15 germplasms of Parashorea chinensis
Germplasm No.	Height (m)	Root collar diameter (mm)	Leaf area (m2)	Root biomass (g)	Stem biomass (g)	Leaf biomass (g)	Total biomass (g)	Pn/μmol·m-2·s-1	Gs/mol·m-2·s-1	Ci/μmol·mol-1	Tr/mmol·m-2·s-1	Fv/Fm	qP	NPQ	Chlorophyll a/mg·g-1	Chlorophyll b/mg·g-1
HK01	18.92±0.16 i	4.60±0.09 a	20.02±0.15 d	0.11±0.00 fg	0.21±0.01 ef	0.28±0.02 ef	0.60±0.02 gh	31.70±0.19 j	0.30±0.01 f	131.05±12.36 i	0.69±0.18 e	0.84±0.09 a	0.28±0.15 e	0.61±0.16 cd	0.34±0.01 fg	0.18±0.00 ef
HK02	18.40±0.11 i	3.52±0.12 fg	15.74±0.21 h	0.06±0.00 h	0.08±0.00 i	0.12±0.01 gh	0.26±0.01 l	37.62±0.18 f	0.39±0.02 cd	158.73±18.20 f	0.94±0.29 b	0.82±0.05 a	0.31±0.08 cde	0.57±0.07 de	0.37±0.01 def	0.20±0.01 de
HK03	21.89±0.08 d	4.41±0.15 bc	13.53±0.23 j	0.09±0.02 g	0.26±0.04 bcde	0.32±0.01 cde	0.67±0.02 de	41.63±0.43 d	0.41±0.06 c	132.32±10.80 h	0.83±0.21 c	0.82±0.06 a	0.27±0.16 e	0.74±0.15 ab	0.58±0.02 b	0.31±0.01 b
MG01	18.95±0.15 i	3.41±0.21 g	19.47±0.45 e	0.17±0.01 de	0.17±0.02 fg	0.27±0.01 f	0.61±0.03 fg	43.76±0.25 b	0.42±0.01 bc	113.98±11.12 j	0.82±0.21 c	0.81±0.05 a	0.34±0.08 bcd	0.75±0.17 ab	0.29±0.01 h	0.16±0.00 fg
MG02	19.90±0.21 g	3.42±0.13 g	11.50±0.12 m	0.15±0.01 e	0.29±0.02 abc	0.29±0.01 def	0.73±0.02 c	34.88±0.15 h	0.35±0.04 de	105.84±10.90 l	0.82±0.15 cd	0.76±0.04 a	0.39±0.09 ab	0.83±0.04 a	0.34±0.01 fg	0.19±0.01 de
MG03	19.10±0.21 i	4.55±0.18 ab	12.03±0.32 l	0.10±0.01 fg	0.11±0.01 hi	0.26±0.02 f	0.47±0.02 j	40.14±0.23 e	0.42±0.03 bc	106.61±12.35 kl	0.72±0.24 e	0.84±0.05 a	0.17±0.05 f	0.80±0.15 a	0.51±0.02 c	0.26±0.01 c
ML01	19.59±0.18 h	3.41±0.21 g	16.17±0.21 g	0.10±0.01 bcd	0.27±0.01 abcd	0.28±0.01 ef	0.65±0.01 ef	23.46±0.21 m	0.23±0.03 g	104.76±11.50 m	0.51±0.11 f	0.80±0.06 a	0.29±0.17 de	0.69±0.13 bc	0.40±0.01 d	0.22±0.01 d
ML02	21.50±0.19 e	4.38±0.09 c	28.30±0.28 b	0.19±0.00 ab	0.22±0.01 def	0.15±0.02 g	0.56±0.01 hi	29.62±0.49 l	0.30±0.01 f	156.32±11.12 g	0.75±0.11 cde	0.80±0.05 a	0.38±0.13 abc	0.67±0.17 c	0.26±0.01 h	0.15±0.00 fg
ML03	17.80±0.12 k	3.40±0.27 g	10.56±0.25 n	0.21±0.02 fg	0.24±0.01 cde	0.61±0.01 a	0.74±0.01 c	33.40±0.16 i	0.32±0.02 ef	173.29±10.21 c	0.74±0.19 de	0.84±0.06 a	0.14±0.08 f	0.66±0.20 c	0.40±0.01 d	0.21±0.01 de
ML04	20.59±0.17 f	4.04±0.19 de	14.18±0.19 i	0.10±0.00 f	0.15±0.03 gh	0.10±0.00 h	0.35±0.00 k	23.67±0.62 m	0.22±0.02 g	195.02±11.45 a	0.57±0.31 f	0.81±0.05 a	0.19±0.10 f	0.63±0.22 cd	0.26±0.01 h	0.14±0.01 g
NP01	19.50±0.21 h	4.64±0.24 a	21.53±0.24 c	0.12±0.03 bc	0.13±0.02 ghi	0.45±0.01 b	0.70±0.01 cd	36.87±0.25 g	0.35±0.05 de	168.87±12.36 d	0.70±0.21 e	0.87±0.07 a	0.28±0.02 e	0.42±0.12 f	0.38±0.05de	0.21±0.06 de
NP02	22.54±0.31 b	4.19±0.23 d	11.95±0.27 l	0.20±0.01 a	0.31±0.01 ab	0.33±0.01 cd	0.84±0.02 b	43.24±0.41 c	0.41±0.05 c	107.16±15.20 k	0.74±0.15 de	0.84±0.09 a	0.26±0.09 e	0.47±0.25 f	0.58±0.02 b	0.31±0.01 b
NP03	23.40±0.32 a	4.67±0.25 a	29.00±0.13 a	0.23±0.01 a	0.32±0.01 a	0.35±0.00 c	0.90±0.01 a	48.76±0.21 a	0.47±0.06 ab	114.02±13.21 j	0.82±0.23 cd	0.86±0.04 a	0.44±0.14 a	0.64±0.09 cd	0.81±0.03 a	0.43±0.02 a
NP04	22.28±0.24 c	3.91±0.18 e	12.89±0.16 k	0.18±0.02 cd	0.22±0.01 def	0.16±0.01 g	0.55±0.03 i	34.39±0.13 h	0.47±0.02 a	163.04±10.30 e	1.03±0.13 a	0.83±0.08 a	0.18±0.06 f	0.5±0.15 ef	0.33±0.05 g	0.20±0.04 de
TY01	19.70±0.35 h	3.60±0.07 f	18.60±0.19 f	0.12±0.02 f	0.13±0.00 ghi	0.35±0.02 c	0.61±0.05 fg	30.46±0.12 k	0.32±0.01 ef	193.71±10.20 b	0.73±0.11 e	0.87±0.14 a	0.15±0.14 f	0.56±0.23 cd	0.36±0.01 efg	0.20±0.01 de
Mean	20.27±1.84	4.01±0.59	17.03±2.13	0.14±0.05	0.21±0.05	0.29±0.02	0.62±0.02	35.57±0.27	0.36±0.03	168.71±12.09	0.76±0.19	0.83±0.07	0.27±0.13	0.63±0.19	0.41±0.15	0.22±0.08
CV (%)	8.26	12.46	34.06	35.92	36.71	45.49	27.27	0.2035	0.2173	0.2315	0.1695	0.0363	0.3395	0.1855	0.3575	0.3378
Note: Values are means ± SD. In each column, bold indicates the lowest value and bold italics indicates the highest value. Significant differences within a column were identified by ANOVA using Duncan’s multiple range test (P < 0.05) and are indicated by different letters.

## Sheet: Table S4
Table S4 Character value and contribution rate of principal components
Principal component	Character value	Variance contribution rate/%	Cumulative contribution rate/%
1	5.125	39.425	39.425
2	2.366	18.198	57.624
3	1.866	14.354	71.978
4	1.363	10.487	82.465
5	0.832	6.396	88.861
6	0.566	4.356	93.217
7	0.452	3.475	96.693
8	0.218	1.679	98.372
9	0.147	1.132	99.504
10	0.045	0.347	99.851
11	0.011	0.087	99.937
12	0.008	0.061	99.999
13	0	0.001	100
